# Supplementary material for: Cyclic Peptides to Improve Delivery and Exon Skipping of Antisense Oligonucleotides in a Mouse Model for Duchenne Muscular Dystrophy
Source: PubMed Central journal article supplement — Mol Ther. 2017 Oct 12;26(1):132–47. doi: 10.1016/j.ymthe.2017.10.004 (PMC5763161; doi:10.1016/j.ymthe.2017.10.004), 2017-10-12
Supplement: mmc1.pdf [file mmc1.pdf]

YMTHE, Volume 26

## **Supplemental Information**

### **Cyclic Peptides to Improve Delivery and Exon Skipping of Antisense Oligonucleotides in a Mouse Model for Duchenne Muscular Dystrophy**

**Silvana M.G. Jirka, Peter A.C. 't Hoen, Valeriano Diaz Parillas, Christa L. Tanganyika-de Winter, Ruurd C. Verheul, Begona Aguilera, Peter C. de Visser, and Annemieke M. Aartsma-Rus**

**Figure S1**  
**Next Generation Sequencing results**

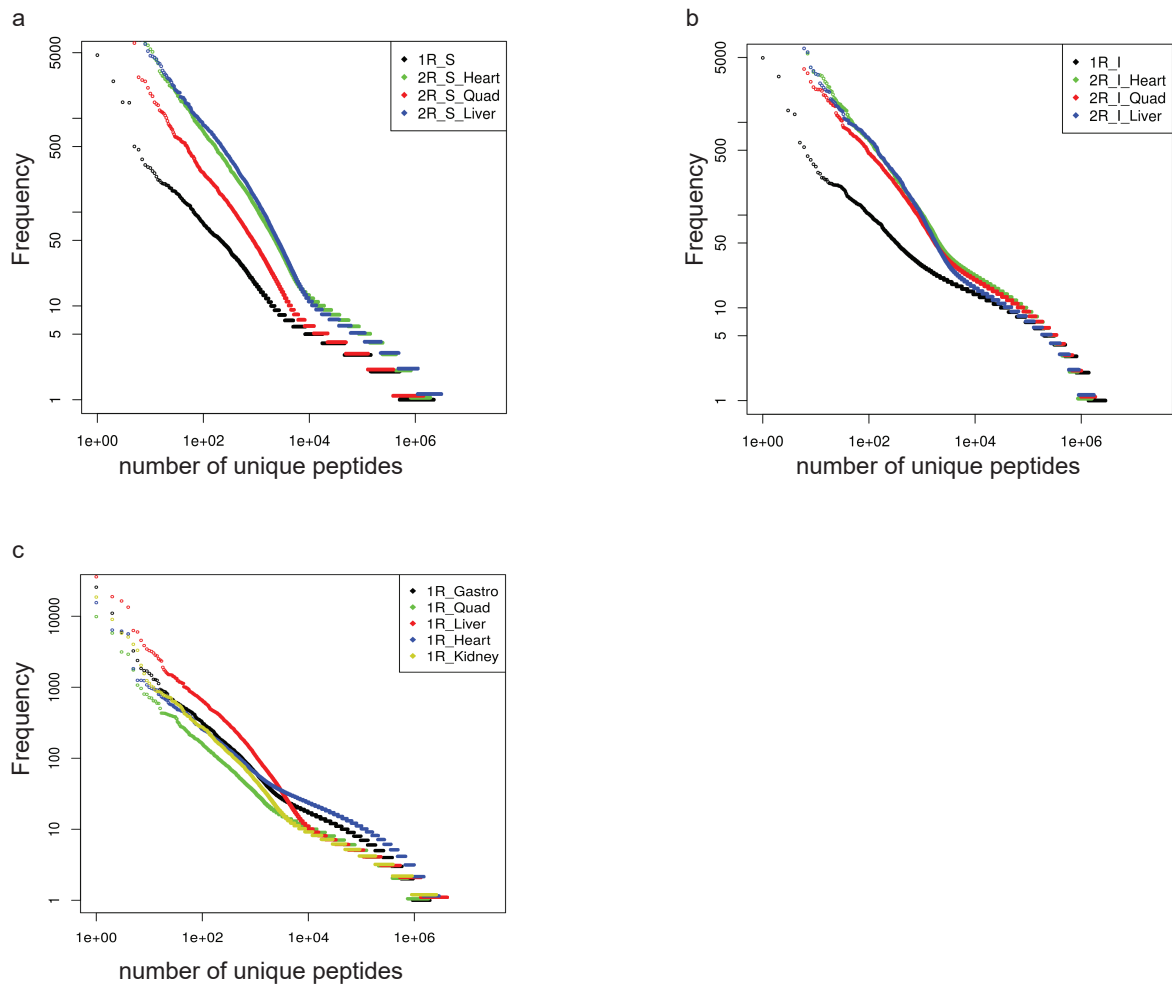

Graphical representation of the NGS output, illustrating the differences between the enriched libraries. a) Comparison of first round in vitro surface bound phages and second round in vivo with surface bound phages. b) Comparison of first round in vitro internalized phages and second round in vivo with internalized phages. c) First round in vivo with naive library. 1R = first round; 2R = second round; S = surface bound phages; I = internalized phages; Quad = Quadri-ceps; Gastro = Gastrocnemius

**Figure S2**  
**Chromatogram**

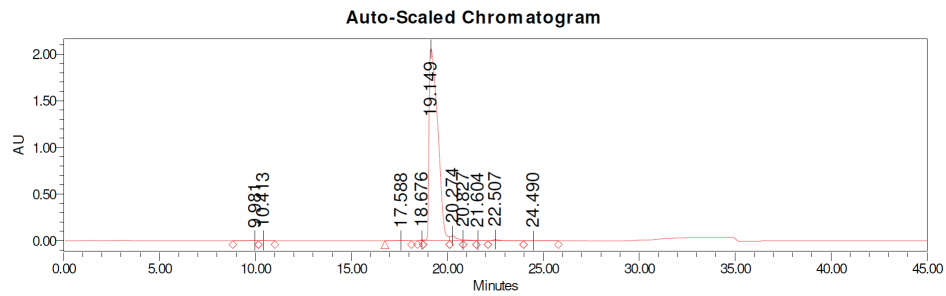

UV chromatogram of pooled CyPep10-23AON conjugate (19.15 min, purity 96%). Method used: RP-UPLC (Waters, including a binary solvent manager, a sample manager (set at 40C) and TUV detection at 256 nm) using a C18 column (Waters OST, 1.7  $\mu$ m; 2.1 x 150mm) at 850C. 5 $\mu$ L injection with 0.3 mL/min flow using a linear gradient from A (7.6% MeOH / 3.6% MeCN in 4 mM aq. TEA with 380 mM HFIP) to B (12.6% MeOH / 3.6% MeCN in 4 mM aq. TEA with 380 mM HFIP). System and data were controlled and analyzed by Empower III software

**Figure S3**  
**Safety evaluation**

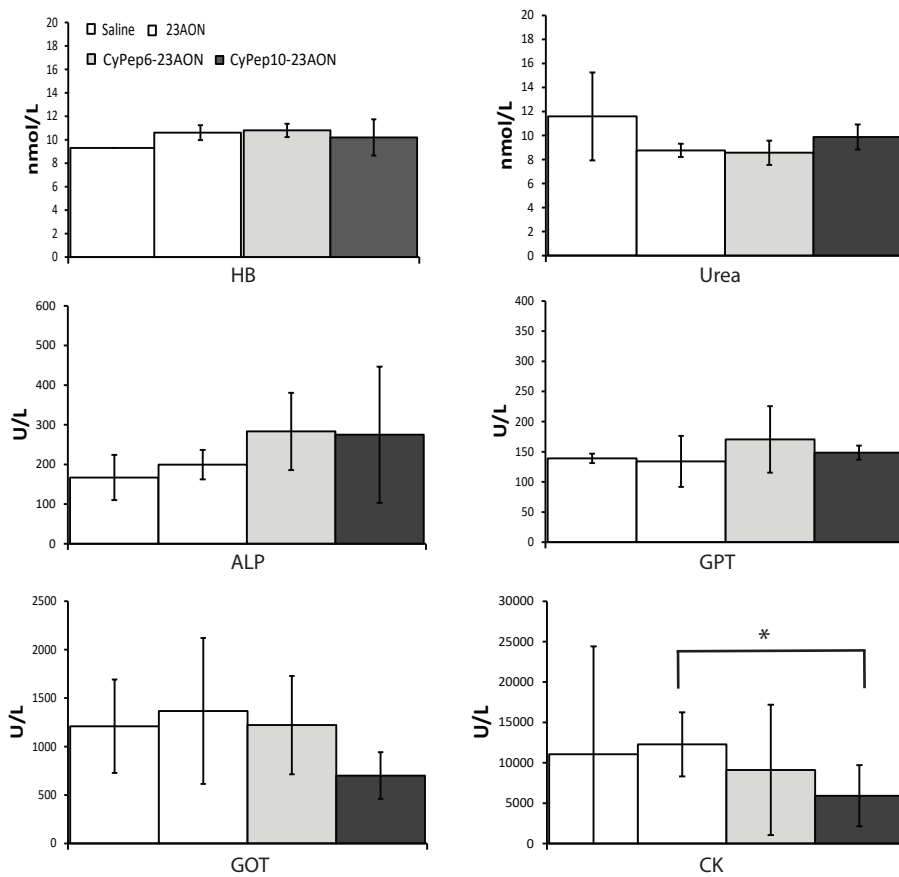

One week after the last injection of (CyPep)-23AONs or saline in mdx mice, blood was taken and evaluated for several safety markers. HB = hemoglobin, ALP = alkaline phosphatase, GPT = glutamate pyruvate transaminase, GOT = glutamic oxaloacetic transaminase, CK = creatine kinase. Bars represent mean  $\pm$  SD. All markers were in normal range for mdx mice. \* = significant ( $P < 0.05$ ).

**Table S1**  
**Next Generation Sequencing results**

|                                                      | number of reads | number of unique sequences | Ratio reads/sequences |
|------------------------------------------------------|-----------------|----------------------------|-----------------------|
| <b>Naive library, no selection</b>                   |                 |                            |                       |
| PhD C7C naive library                                | 19,777,424      | 10,496,839                 | 1.88                  |
| PhD C7C naive library amplified                      | 21,575,275      | 8,904,844                  | 2.42                  |
| <b>First round in vitro</b>                          |                 |                            |                       |
| surface phages                                       | 1,588,784       | 1,226,241                  | 1.30                  |
| Internalized phages                                  | 3,620,792       | 1,911,741                  | 1.89                  |
| <b>Second round in vivo from surface phages</b>      |                 |                            |                       |
| heart                                                | 2,637,749       | 1,219,358                  | 2.16                  |
| quadriceps                                           | 1,367,520       | 805,268                    | 1.70                  |
| liver                                                | 3,651,870       | 1,895,681                  | 1.93                  |
| <b>Second round in vivo from internalized phages</b> |                 |                            |                       |
| heart                                                | 3,265,403       | 1,126,767                  | 2.90                  |
| quadriceps                                           | 3,322,155       | 1,292,444                  | 2.57                  |
| liver                                                | 2,924,277       | 1,191,698                  | 2.45                  |
| <b>First round in vivo</b>                           |                 |                            |                       |
| gastrocnemius                                        | 2,868,911       | 1,311,263                  | 2.19                  |
| quadriceps                                           | 2,080,098       | 1,160,805                  | 1.79                  |
| heart                                                | 4,602,680       | 2,006,257                  | 2.29                  |
| liver                                                | 4,107,847       | 2,502,776                  | 1.64                  |
| kidney                                               | 2,458,896       | 1,565,835                  | 1.57                  |

An overview of the coverage of the NGS output.

**Table S2**  
**Sequences of primers and TaqMan probes for ddPCR analysis of exon 23 skip in mdx mice**

| ddPCR assay                     | Target Exons | Forward Primer                | Reverse Primer          | Probe Sequence                  |
|---------------------------------|--------------|-------------------------------|-------------------------|---------------------------------|
| non-skipped (including exon 23) | 22-23        | ACTGAATATGAAATAATGGAGGAGAGACT | GCCATTTTGTGCTCTTTCAA    | AAATTACAGGCTCTGCAAG             |
| skipped (exon 23 skipped)       | 22-24        | AGCAGTCAGAAAGCAAACCTCTG       | TTCAGCCATCCATTCTGTAAGGT | TGGAGGAGAGACTCGGAAATTACAGAATCAT |

**Table S3**  
**Molecular weight data of CyPep-AON conjugates**

| Conjugate      | MW (calc) | MW (found) |
|----------------|-----------|------------|
| CyPep10-h45AON | 9211.9    | 9211.5     |
| CyPep6-m23AON  | 8005.8    | 8006.5     |
| CyPep10-m23AON | 8189.1    | 8188.7     |
